# Supplementary material for: Coordination of matrix attachment and ATP-dependent chromatin remodeling regulate auxin biosynthesis and Arabidopsis hypocotyl elongation
Source: PubMed Central journal article supplement (PMC5529009; doi:10.1371/journal.pone.0181804), 2017-07-26
Supplement: pone.0181804.s002.pdf [file pone.0181804.s002.pdf]

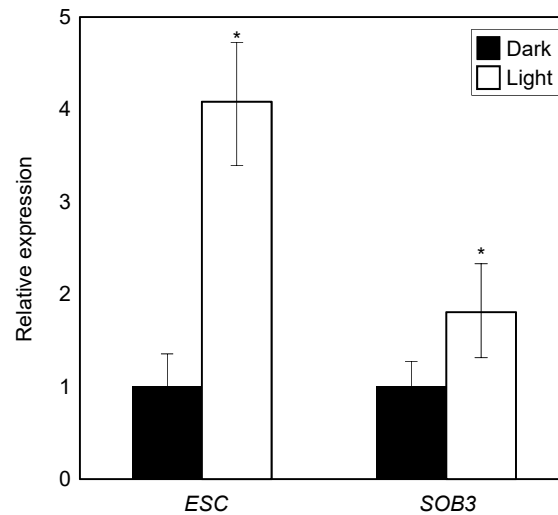

**S2 Fig. Expression of *ESC* and *SOB3* in seedlings grown in continuous light or dark.** Seeds were germinated and incubated in continuous light or dark for 9 days. Whole plants were harvested for total RNA isolation. Transcript accumulation was analyzed by quantitative RT-PCR (RT-qPCR). Biological triplicates were averaged and statistically analyzed by two-tailed Student's *t*-test assuming unequal variance ( $*P < 0.05$ ). Bars indicate standard error of the mean.
