# Supplementary material for: Coordination of matrix attachment and ATP-dependent chromatin remodeling regulate auxin biosynthesis and Arabidopsis hypocotyl elongation
Source: PubMed Central journal article supplement (PMC5529009; doi:10.1371/journal.pone.0181804), 2017-07-26
Supplement: pone.0181804.s003.pdf [file pone.0181804.s003.pdf]

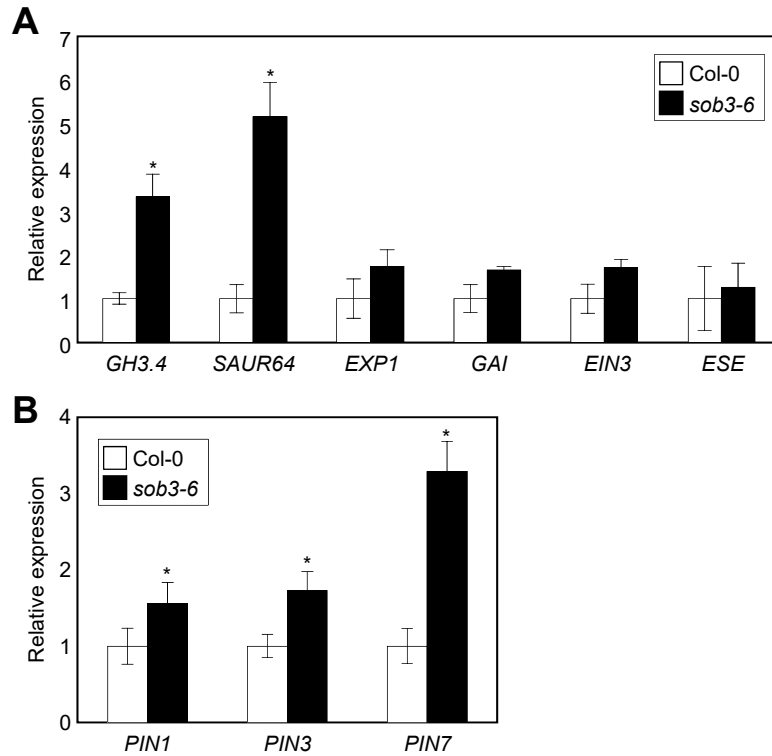

**S3 Fig. Expression of hormone signaling genes in *sob3-6*.**

Ten-day-old seedlings grown under long-day conditions (LDs) were harvested for total RNA isolation. Transcript accumulation of hormone marker genes (**A**) and auxin transport genes (**B**) was analyzed by RT-qPCR. The *eIF4a* gene (At3g13920) was used as an internal control. Biological triplicates were averaged and statistically analyzed by two-tailed Student's *t*-test assuming unequal variance ( $*P < 0.05$ ). Bars indicate standard error of the mean.
