# Supplementary material for: Coordination of matrix attachment and ATP-dependent chromatin remodeling regulate auxin biosynthesis and Arabidopsis hypocotyl elongation
Source: PubMed Central journal article supplement (PMC5529009; doi:10.1371/journal.pone.0181804), 2017-07-26
Supplement: pone.0181804.s004.pdf [file pone.0181804.s004.pdf]

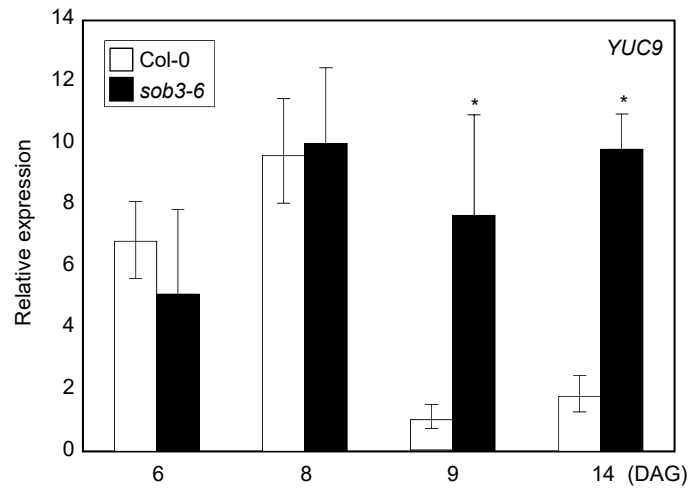

**S4 Fig. Kinetics of *YUC9* expression in *sob3-6*.**

Seedlings were grown under LD conditions for indicated time period (days). Transcript accumulation was analyzed by RT-qPCR. The *eIF4a* gene was used as an internal control. Biological triplicates were averaged and statistically analyzed by two-tailed Student's *t*-test assuming unequal variance ( $*P < 0.05$ ). Bars indicate standard error of the mean. DAG, days after germination.
