# Supplementary material for: Coordination of matrix attachment and ATP-dependent chromatin remodeling regulate auxin biosynthesis and Arabidopsis hypocotyl elongation
Source: PubMed Central journal article supplement (PMC5529009; doi:10.1371/journal.pone.0181804), 2017-07-26
Supplement: pone.0181804.s005.pdf [file pone.0181804.s005.pdf]

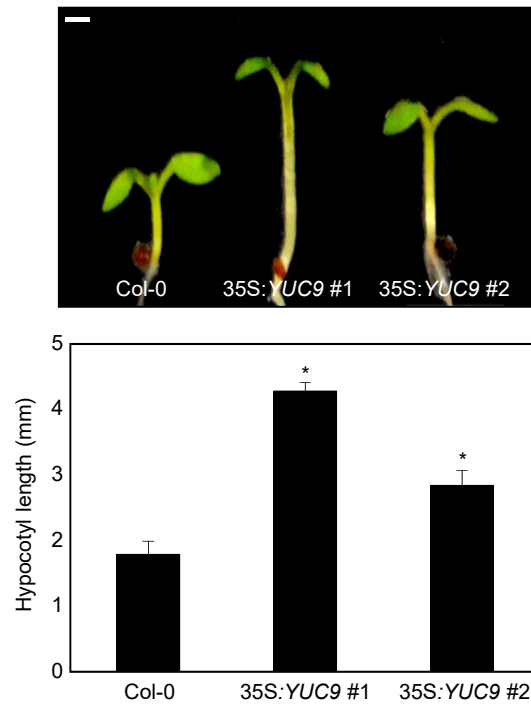

**S5 Fig. Hypocotyl length of 35S:YUC9 transgenic seedlings grown in light.**

Seeds were germinated and grown for 9 days on vertical MS medium in LD conditions. Hypocotyl lengths ( $n > 30$  in each genotype) were measured using Image J applications (<http://rsb.info.nih.gov/ij/>). Biological triplicates were averaged and statistically analyzed by two-tailed Student's *t*-test assuming unequal variance ( $*P < 0.05$ ). Bars indicate standard error of the mean. Scale bar, 1 mm.
