# Supplementary material for: Coordination of matrix attachment and ATP-dependent chromatin remodeling regulate auxin biosynthesis and Arabidopsis hypocotyl elongation
Source: PubMed Central journal article supplement (PMC5529009; doi:10.1371/journal.pone.0181804), 2017-07-26
Supplement: pone.0181804.s006.pdf [file pone.0181804.s006.pdf]

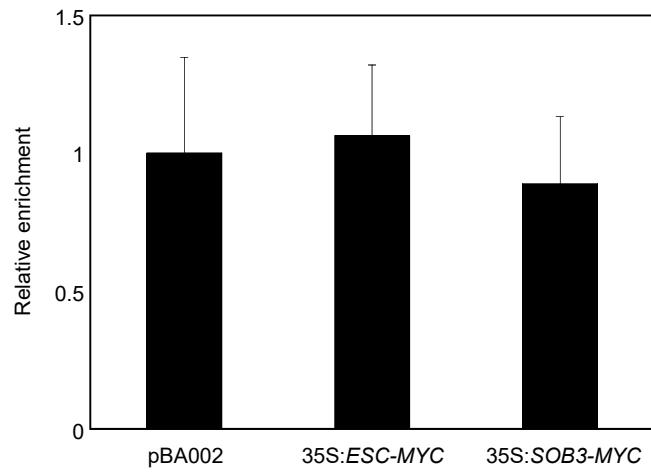

**S6 Fig. ChIP assays using antibody-free resin.**

Enrichment of the putative binding region (D region) of the *YUC9* promoter was analyzed by qPCR after ChIP with resin alone. Biological triplicates were averaged. Bars indicate standard error of the mean.
