# Supplementary material for: Coordination of matrix attachment and ATP-dependent chromatin remodeling regulate auxin biosynthesis and Arabidopsis hypocotyl elongation
Source: PubMed Central journal article supplement (PMC5529009; doi:10.1371/journal.pone.0181804), 2017-07-26
Supplement: pone.0181804.s007.pdf [file pone.0181804.s007.pdf]

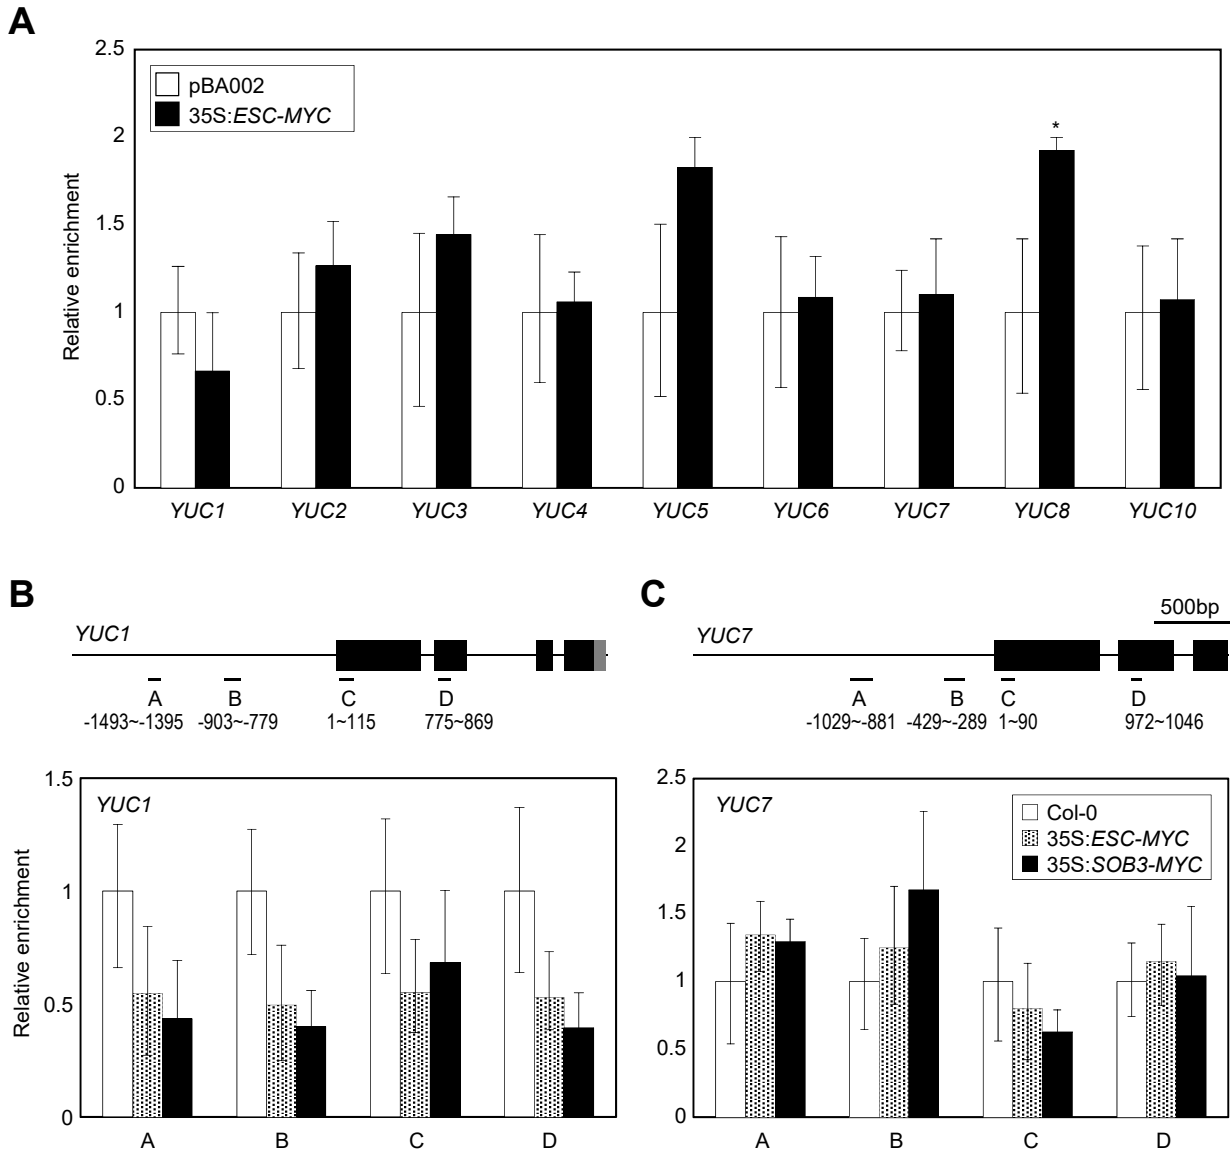

**S7 Fig. Binding of SOB3 and ESC to *YUC* promoters.**

Enrichment of putative binding regions in the *YUC* promoters was analyzed by ChIP-qPCR. We analyzed several different regions predicted by multiple webtools. Biological triplicates were averaged and statistically analyzed by two-tailed Student's *t*-test assuming unequal variance ( $*P < 0.05$ ). Bars indicate the standard error of the mean.
