# Supplementary material for: Coordination of matrix attachment and ATP-dependent chromatin remodeling regulate auxin biosynthesis and Arabidopsis hypocotyl elongation
Source: PubMed Central journal article supplement (PMC5529009; doi:10.1371/journal.pone.0181804), 2017-07-26
Supplement: pone.0181804.s008.pdf [file pone.0181804.s008.pdf]

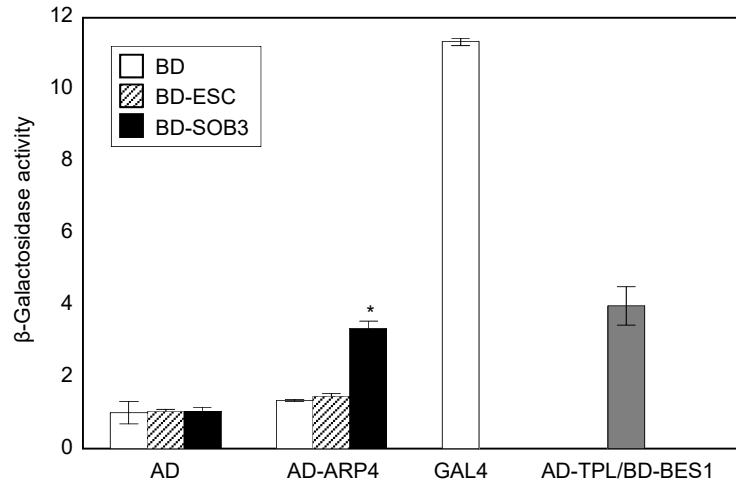

**S8 Fig.  $\beta$ -Galactosidase ( $\beta$ -Gal) activity assays.**

$\beta$ -Gal activity was quantified after growing yeast strains in liquid culture with *o*-nitrophenyl- $\beta$ -D-galactopyranoside as a substrate. Three independent measurements of  $\beta$ -Gal activities were averaged and statistically analyzed by two-tailed Student's *t*-test assuming unequal variance ( $*P < 0.05$ ). Bars indicate standard error of the mean. Coexpression of GAL4 transcriptional activation domain (AD)-TPL and GAL4 DNA-binding domain (BD)-BES1 was performed as a positive control.
