# Supplementary material for: Coordination of matrix attachment and ATP-dependent chromatin remodeling regulate auxin biosynthesis and Arabidopsis hypocotyl elongation
Source: PubMed Central journal article supplement (PMC5529009; doi:10.1371/journal.pone.0181804), 2017-07-26
Supplement: pone.0181804.s010.pdf [file pone.0181804.s010.pdf]

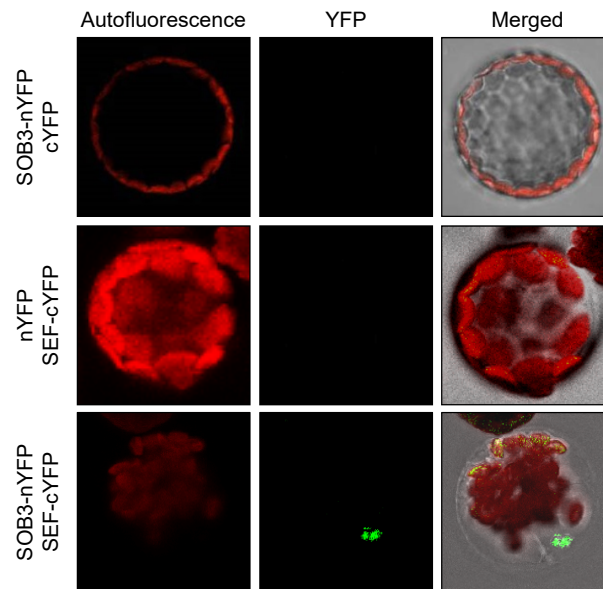

**S10 Fig. Protein complex formation of SOB3 with SWR1.**

Partial fragments of YFP protein were fused with SOB3 and SEF. The constructs were transiently coexpressed in *Arabidopsis* protoplasts.
