# Supplementary material for: Coordination of matrix attachment and ATP-dependent chromatin remodeling regulate auxin biosynthesis and Arabidopsis hypocotyl elongation
Source: PubMed Central journal article supplement (PMC5529009; doi:10.1371/journal.pone.0181804), 2017-07-26
Supplement: pone.0181804.s011.pdf [file pone.0181804.s011.pdf]

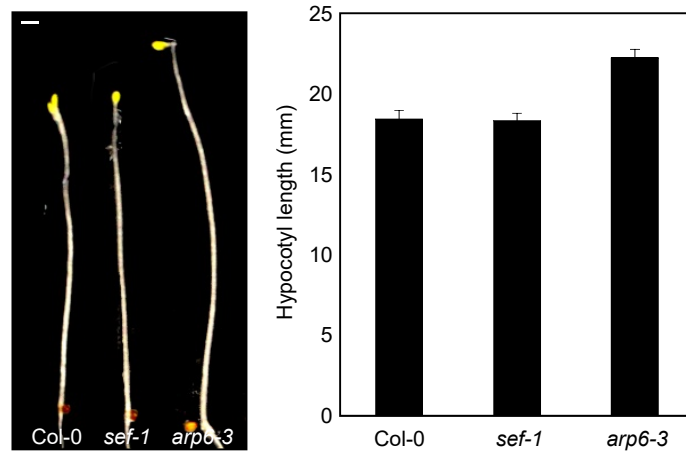

**S11 Fig. Hypocotyl length of genetic mutants of SWR1 components in darkness.**

Seeds were germinated and grown for 9 days on vertical MS medium in darkness. Hypocotyl lengths ( $n > 30$  in each genotype) were measured using Image J applications (<http://rsb.info.nih.gov/ij/>). Biological triplicates were averaged. Bars indicate standard error of the mean. Scale bar, 1 mm.
