# Supplementary material for: Coordination of matrix attachment and ATP-dependent chromatin remodeling regulate auxin biosynthesis and Arabidopsis hypocotyl elongation
Source: PubMed Central journal article supplement (PMC5529009; doi:10.1371/journal.pone.0181804), 2017-07-26
Supplement: pone.0181804.s012.pdf [file pone.0181804.s012.pdf]

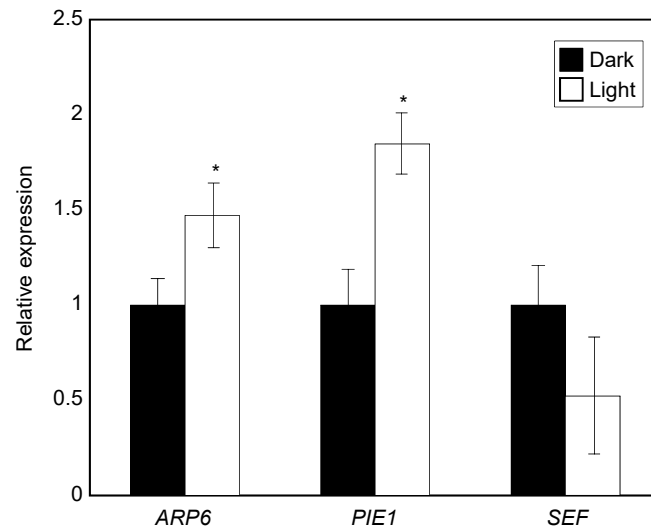

**S12 Fig. Expression of genes encoding SWR1 components in seedlings grown in continuous light or continuous dark.**

Seeds were germinated and incubated in continuous light or continuous dark for 9 days. Whole plants were harvested for total RNA isolation. Transcript accumulation was analyzed by RT-qPCR. Biological triplicates were averaged and statistically analyzed by two-tailed Student's *t*-test assuming unequal variance (\* $P < 0.05$ ). Bars indicate standard error of the mean.
