# Supplementary material for: Coordination of matrix attachment and ATP-dependent chromatin remodeling regulate auxin biosynthesis and Arabidopsis hypocotyl elongation
Source: PubMed Central journal article supplement (PMC5529009; doi:10.1371/journal.pone.0181804), 2017-07-26
Supplement: pone.0181804.s013.pdf [file pone.0181804.s013.pdf]

| Primer  | Usage   | Sequence              |                       |
|---------|---------|-----------------------|-----------------------|
|         |         | F                     | R                     |
| eIF4a   | RT-qPCR | TGACCACACAGTCTCTGCAA  | ACCAGGGAGACTTGTGGAC   |
| ARP6    | RT-qPCR | ACGAAATCGACCTCACCTCC  | CGGAAGGGATTGAGAGTGGT  |
| CYP79B2 | RT-qPCR | CTTACCGCCGATGAAATCAA  | TTGTGTCAGAAAGTGCCACG  |
| CYP79B3 | RT-qPCR | AACAAGACGCACTCTTTGCG  | GCCTCTTGATTGCATTTCCA  |
| EIN3    | RT-qPCR | GGTTTGATGCAACACTGTGA  | GTTGAGGCCACCAATCCTCT  |
| ESE1    | RT-qPCR | GGACGTTTAAACACAGCGGAA | ATATCCCAGCAGCAGGGAAG  |
| ESC     | RT-qPCR | ATATTTTTAGCCGGAGGGCA  | TCTCTCGAAAACCGCATTTG  |
| EXP1    | RT-qPCR | TCTTACCTTAACGGACAATC  | GAAGCACCACTTCTTTTAG   |
| GAI     | RT-qPCR | CTGGTTGACTCGCAGGAGAA  | TTTCTCATCGCTCCGATTTG  |
| GH3.4   | RT-qPCR | TTCAATCTGGGATGGCTTCA  | CACCGGAACTTTGCTTTGA   |
| PIE1    | RT-qPCR | GAATCTAAGGATCGGGCAGC  | CCAGCAAGTAGGTGAAGGCA  |
| PIN1    | RT-qPCR | CACCTGGTCCCTCATTTCTT  | TGCCTGGATAATGGCAACAT  |
| PIN3    | RT-qPCR | TTTCCCTCTCCACACTTCCC  | CACTGGAGGACGACGATTTG  |
| PIN7    | RT-qPCR | ATGCTGGTCTTGGTATGGCA  | GGCAATGCAGCTTGAACAAT  |
| SAUR64  | RT-qPCR | AAGAAGAGTTTGGCCTCCCA  | CTGCATCCATTCTGCTTTGG  |
| SEF     | RT-qPCR | CGGCTCTTACAAGCAACGAC  | AGTCGGTACATGCGACGGTA  |
| SOB3    | RT-qPCR | AGAGATAGCCCCAACGTGCT  | GGCAACACCGTACCTGTGAG  |
| TAA1    | RT-qPCR | ACTCGAGGAAACCCGAAAAA  | TCACCGTACACCTGTACCCC  |
| YUCCA1  | RT-qPCR | TCCTAACGGCTGGAGAGGAG  | GTGGACCCCTTGATTTCTGTC |
| YUCCA2  | RT-qPCR | GAGAATGCCGAGGAGGTGAT  | CAAACCTCCATCCCGGAGTT  |
| YUCCA3  | RT-qPCR | GTTTCAAAACCTCATCCCCG  | GCAATGCAGTTAGTCTCGCTC |
| YUCCA4  | RT-qPCR | GCGAGCTTCTCTTATGCCT   | CGAACTCTGCTTTCTCGACG  |
| YUCCA5  | RT-qPCR | TCACAACGGAGTTTGAAGGC  | AGACTTCCATGCCGGAGTTT  |
| YUCCA6  | RT-qPCR | CTACGCTCGGAGGTTTGACA  | ACTCCGTCGTGCCTTCTTCT  |
| YUCCA7  | RT-qPCR | TCAATGGTTCGTTTCAAGCTC | TACCTGCGGTGTTCTTCAGC  |
| YUCCA8  | RT-qPCR | TGAGTTTTCCGGTGAGGTGA  | AGAAACTTCCATGCCGGAGT  |
| YUCCA9  | RT-qPCR | GTTCTTGTCTCGTGGATGTGG | CCCCATAATCTCCCTCGGTA  |
| YUCCA10 | RT-qPCR | AGGTGAAATTCGGTATGG    | ATGACAGGAGCTTTTCCGGT  |
| YUCCA11 | RT-qPCR | TGAACAAGCTAATCACCCGC  | TCTTCCCCTTCCAGTGATCC  |

**S1 Table. Primers used in RT-qPCR.**

RT-qPCR primers were designed using the Primer Express Software installed into the Applied Biosystems 7500 Real-Time PCR System. The sizes of PCR products ranged from 80 to 300 nucleotides in length. F, forward primer; R, reverse primer.
