# Supplementary material for: Coordination of matrix attachment and ATP-dependent chromatin remodeling regulate auxin biosynthesis and Arabidopsis hypocotyl elongation
Source: PubMed Central journal article supplement (PMC5529009; doi:10.1371/journal.pone.0181804), 2017-07-26
Supplement: pone.0181804.s014.pdf [file pone.0181804.s014.pdf]

| Primer     | Sequence                             |                                     |
|------------|--------------------------------------|-------------------------------------|
|            | F                                    | R                                   |
| eIF4a      | TGACCACACAGTCTCTGCAA                 | ACCAGGGAGACTTGTGGAC                 |
| YUCCA1     | TTTCAAATATCCAGGCAAT                  | AGTAAATGGCAGTCCAAA                  |
| YUCCA2     | ACACTCGAGAAATGCAAAAT                 | AAAAGAAACCAAGCTGAAA                 |
| YUCCA3     | ATGCAAAGAAAAGAAGATGC                 | TTGATGCAAATTGGTAATTG                |
| YUCCA4     | ATCATGGAAGTCATGAAACA                 | TTTGATACTTCGTGAGCAA                 |
| YUCCA5     | TCATTATGATTGGTCCATTG                 | TGGAATCATTTCGATTCTTTT               |
| YUCCA6     | ATTGCACCCATTCTCTAAA                  | CATCAAACTAAGCATCGAAA                |
| YUCCA7     | TAGATTTGGTTTGTGCATTG                 | GGTTTTAATCCCGTTCATTA                |
| YUCCA8     | TTCCGTACCTAAAAATTGGA                 | AAGAAAAAGATGACGTGGAA                |
| YUCCA10    | TGTATTCAAACCCCATCTT                  | ATCTTGAAAAATGTGAACACC               |
| YUCCA1 (A) | ATGTTTGAGTTGGAAACGTCTG               | AAAAATAGCCGAAGGTGATTATAAC           |
| YUCCA1 (B) | TGTAGGTTTTTTTACACAAATATAG            | TCTGAGACATTCATGTTAACCTATAG          |
| YUCCA1 (C) | ATGGAGTCTCATCTCACAAAC                | TCGAGAGACATGCTGAAGTG                |
| YUCCA1 (D) | ATCAACATTTGGAGTTGGAATG               | TTCCAAACGAAAGATTGG                  |
| YUCCA7 (A) | CAATAATACAAGAGGAATAATTGTG            | GTGAAATCTATTCATGTGCAG               |
| YUCCA7 (B) | CAAATCATTCCGATACATCATAAC             | AGAATGAAACTGACACTTATTGAAAAG         |
| YUCCA7 (C) | ATGTGTAATAACAATAACACAAGTTGTG         | ATTCACCCAGATGCAACGAC                |
| YUCCA7 (D) | AAGAGGCCGAAATTGGACC                  | AATGGCTCCGATGTCTAGC                 |
| YUCCA9 (A) | TTTGATCTAAGTCTTTATATATAATTTTCATATTCG | AATATTTTTGGGAAGTACAGTATATATGC       |
| YUCCA9 (B) | ATTAACTCGGAGATATTAATGATTTCTATAGGTTAG | GTTTCCTTTTACTTTTATTTTACTTTAAGACTAAC |
| YUCCA9 (C) | ACTCTCTAGTTTCTCTACAATGGTCGTTTAG      | TCCAGTACCATGAGCTTCAGTATGATC         |
| YUCCA9 (D) | AATCGAATATTTTTATTTTTTATACAAAAACG     | TTTAGTTAGGACCTAACTTTTGTTCATATGC     |
| YUCCA9 (E) | TTGTGGTCGAGAGATCAGATTG               | AATTTCTTGGCAAGTGAAAG                |
| YUCCA9 (F) | TTATCAAACTATGGGCTTAAAAG              | TTCTACGTCGCCGGATTTTATC              |

**S2 Table. Primers used in ChIP assays.**

The sizes of PCR products ranged from 80 to 300 nucleotides in length. F, forward primer; R, reverse primer.
